# Supplementary material
Source: publisher figshare collection journal article supplement (https://frontiersin.figshare.com/ndownloader/files/26240614)
Supplement: Supplementary file [file 26240614]

# Supplementary File 1

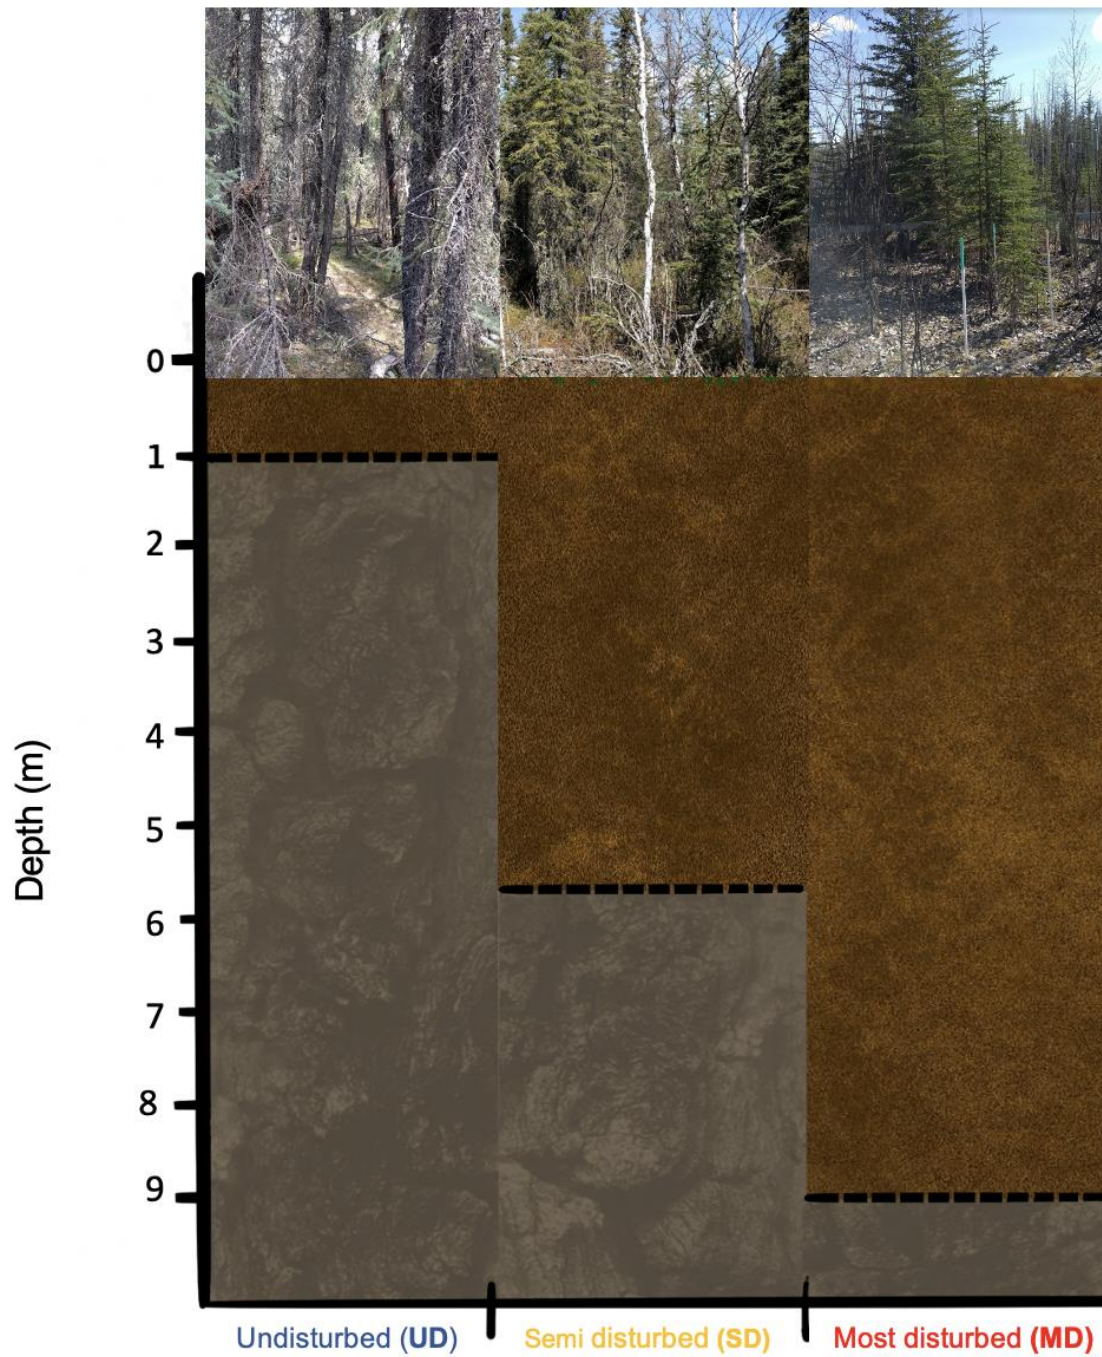

**Supplementary Figure 1.** Fairbanks Permafrost Experiment Station (FPES) plot layout and permafrost thaw levels and above ground plant cover
